# Supplementary material
Source: PubMed Central journal article supplement (PMC5766936)
Supplement: 10.1074_M117.814202_jbc.M117.814202-1.pdf [file 10.1074_M117.814202_jbc.M117.814202-1.pdf]

# The small molecule luteolin inhibits *N*-acetyl- $\alpha$ -galactosaminyltransferases and reduces mucin-type *O*-glycosylation of amyloid precursor protein

Feng Liu<sup>1</sup>, Kai Xu<sup>5</sup>, Zhijue Xu<sup>1</sup>, Matilde de las Rivas<sup>2</sup>, Xing Li<sup>1</sup>, Jishun Lu<sup>1</sup>, Ignacio Delso<sup>3</sup>, Pedro Merino<sup>2</sup>, Ramon Hurtado-Guerrero<sup>2, 4, \*</sup> and Yan Zhang<sup>1, \*</sup>

<sup>1</sup>Key Laboratory of Systems Biomedicine (Ministry of Education) and Collaborative Innovation Center of Systems Biomedicine, Shanghai Center for Systems Biomedicine, Shanghai Jiao Tong University, 800 Dongchuan Road, Shanghai 200240, China.

<sup>2</sup>Instituto de Biocomputación y Física de Sistemas Complejos (BIFI), BIFI-IQFR (CSIC) Joint Unit, Universidad de Zaragoza, 50009, Zaragoza, Spain.

<sup>3</sup>Instituto de Síntesis Química y Catálisis Homogénea (ISQCH). Universidad de Zaragoza. CSIC. E-50009 Zaragoza. Aragón, Spain.

<sup>4</sup>Fundación ARAID, 50018 Zaragoza, Spain.

<sup>5</sup>Key Laboratory of Exploration and Utilization of Aquatic Genetic Resources, Ministry of Education, College of Fisheries and Life Science, Shanghai Ocean University, Shanghai 201306, China.

**Running title:** Luteolin inhibits ppGalNAc-Ts

## \*To whom correspondence should be addressed:

Yan Zhang, Shanghai Center for Systems Biomedicine, Shanghai Jiao Tong University, 800 Dongchuan Rd., 200240, Shanghai, China; Tel./Fax: 86-21-34206778; E-mail: yanzhang2006@sjtu.edu.cn.

Ramon Hurtado-Guerrero, Instituto de Biocomputación y Física de Sistemas Complejos (BIFI), BIFI-IQFR (CSIC) Joint Unit, Universidad de Zaragoza, 50009, Zaragoza, Spain; Tel.: +34 976 762997, fax: + 34 976 762990; E-mail: rhurtado@bifi.es.

**Key words:** *O*-glycosylation, ppGalNAc-T, glycosylation inhibitor, glycoprotein, glycosyltransferase, luteolin, amyloid precursor protein (APP), crystal structure

## TABLE OF CONTENTS

### 1. SUPPLEMENTAL TABLE

Table S1. Data collection and refinement statistics.

### 2. SUPPLEMENTAL FIGURES

Figure S1. Aggregation-based activity of luteolin with ppGalNAc-T2.

Figure S2. Dose-dependent inhibition of ppGalNAc-Ts by luteolin in the presence of EA2 substrate and inhibition of ppGalNAc-T2 by luteolin in the presence of various substrates.

Figure S3. Sequence of ppGalNAc-T2.

Figure S4. Surface representation of one of the dimers present in the asymmetric unit.

Figure S5. Stacked <sup>1</sup>H NMR spectra of luteolin in deuterated buffer.

**Table S1.** Data collection and refinement statistics. Values in parentheses refer to the highest resolution shell. Ramachandran plot statistics were determined with PROCHECK.

|                                                                                       | ppGalNAc-T2 in complex with the luteolin and UDP/Mn <sup>+</sup> |
|---------------------------------------------------------------------------------------|------------------------------------------------------------------|
| Space group                                                                           | P2 <sub>1</sub> 2 <sub>1</sub> 2 <sub>1</sub>                    |
| Wavelength (Å)                                                                        | 0.97                                                             |
| Resolution (Å)                                                                        | 20-2.30<br>(2.42-2.30)                                           |
| Cell dimensions<br>a, b, c (Å)<br>$\alpha$ , $\beta$ , $\gamma$ (°)                   | a = 116.98<br>b = 123.11<br>c = 248.15<br>90, 90, 90             |
| Mn(I) half-set correlation CC (1/2)                                                   | 0.997 (0.590)                                                    |
| Unique reflections                                                                    | 151903                                                           |
| Completeness                                                                          | 95.5 (99.5)                                                      |
| R <sub>pim</sub>                                                                      | 0.050 (0.535)                                                    |
| I/ $\sigma$ (I)                                                                       | 10.3 (1.6)                                                       |
| Redundancy                                                                            | 6.7 (6.9)                                                        |
| R <sub>work</sub> / R <sub>free</sub>                                                 | 0.213/0.251                                                      |
| RMSD from ideal geometry, bonds (Å)                                                   | 0.013                                                            |
| RMSD from ideal geometry, angles (°)                                                  | 1.710                                                            |
| <B> GalNAc-T2 (Å <sup>2</sup> )                                                       | 54.66                                                            |
| <B> UDP (Å <sup>2</sup> )                                                             | 49.23                                                            |
| <B> luteolin (Å <sup>2</sup> )                                                        | 103.02                                                           |
| <B> solvent (Å <sup>2</sup> )                                                         | 44.38                                                            |
| <B> ethylenglycol(Å <sup>2</sup> )                                                    | 64.17                                                            |
| Ramachandran plot:<br>Most favoured (%)<br>Additionally allowed (%)<br>Disallowed (%) | 96.50<br>3.03<br>0.48                                            |
| PDB ID                                                                                | 5NDF                                                             |

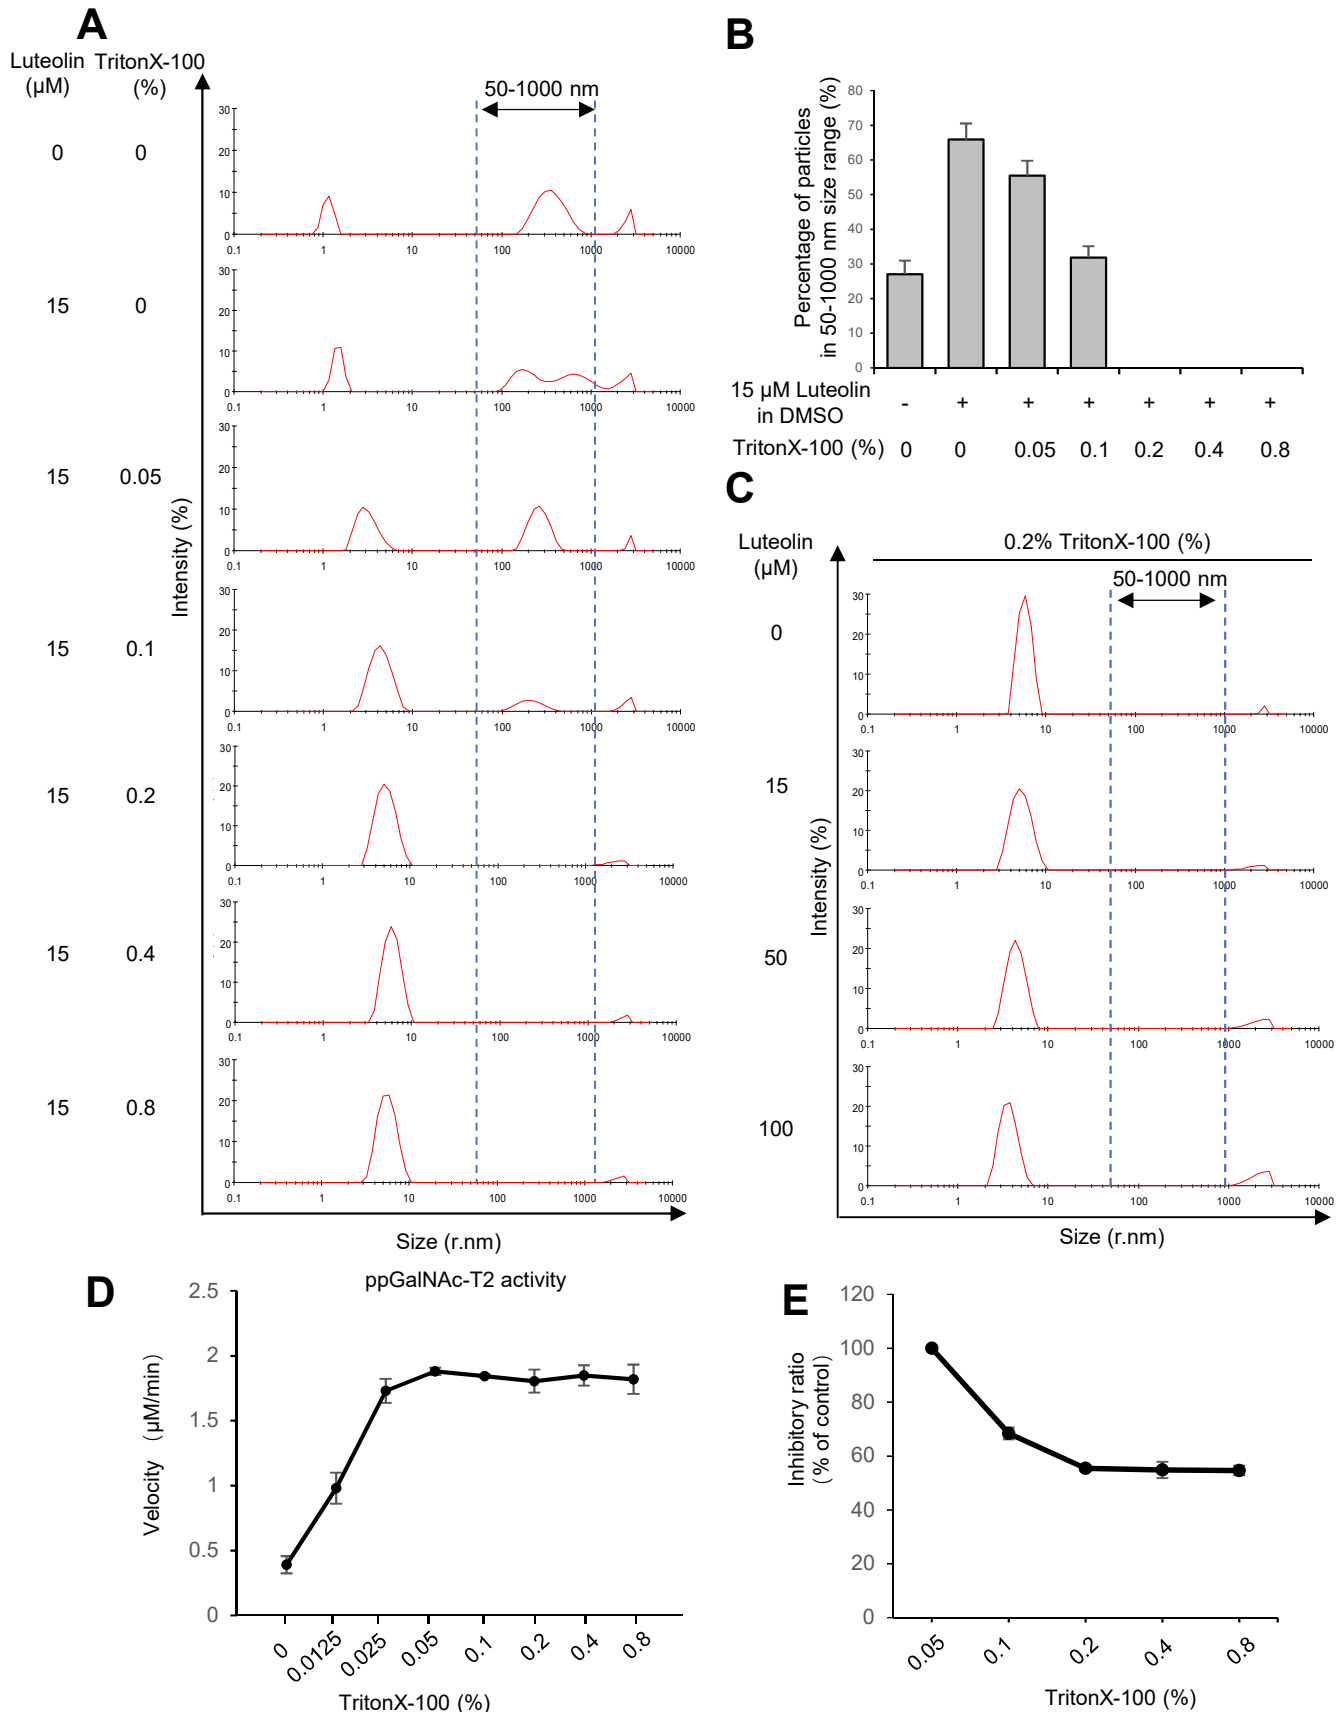

**Fig. S1 Aggregation-based activity of luteolin with ppGalNAc-T2.** (A-C) The particle spectrum change of luteolin in different concentration of TritonX-100 (v/v). The particles spectrum was measured by dynamic light scattering (DLS, Particle Size Analyzer, Z90s, Malvern Instruments Ltd., UK). (D) The change of ppGalNAc-T2 catalytic velocity with different concentrations of TritonX-100 (v/v). (E) The inhibitory potency of luteolin (15 mM) under the different concentrations of TritonX-100 (v/v). 10 mM EDTA was used as 100% inhibitor control. Data are shown as the mean  $\pm$  SD (n=3). Two-tailed Student's t-test, \*\*, P<0.01; \*\*\*, P<0.001; n.s., no significant difference.

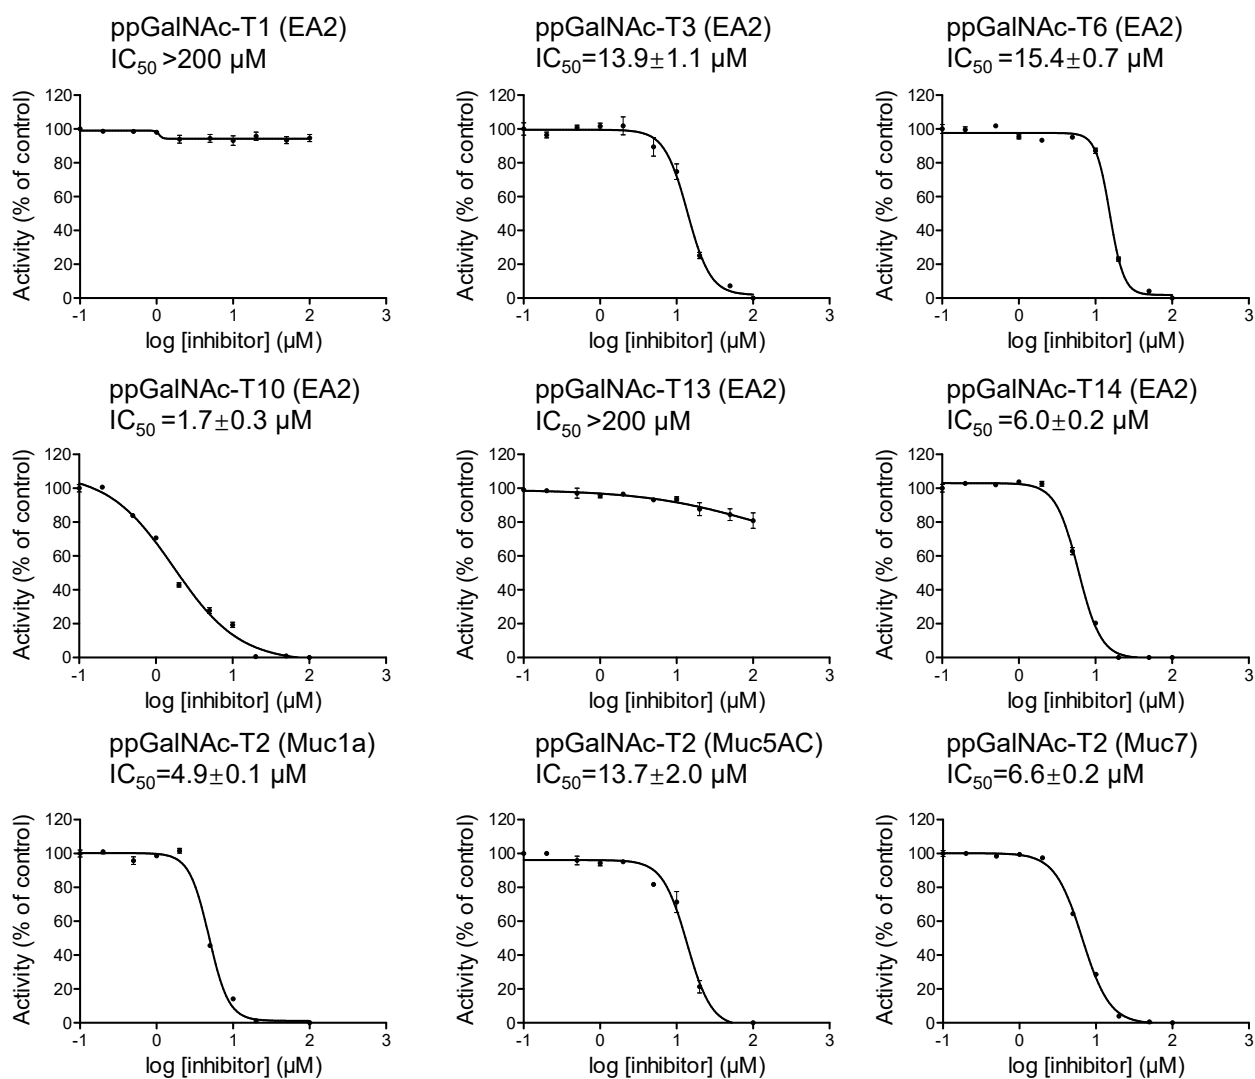

**Fig. S2 Dose-dependent inhibition of ppGalNAc-Ts by luteolin in the presence of EA2 substrate and inhibition of ppGalNAc-T2 by luteolin in the presence of various substrates.** The IC<sub>50</sub> values of luteolin for ppGalNAc-Ts were determined under the standard conditions of the HPLC-based assay with EA2, Muc1a, Muc5AC or Muc7 as the substrate (Experimental Procedures). The data are expressed as percentages of the control (DMSO, 100%) and shown as the mean ± SD (n=3).

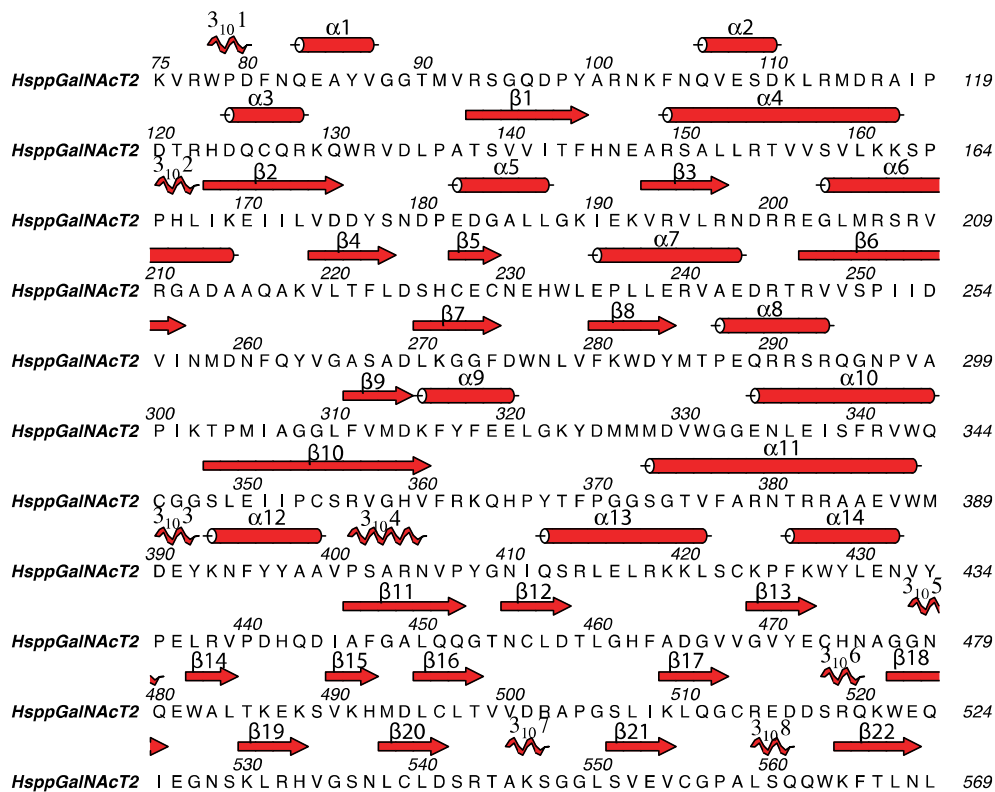

**Fig. S3 Sequence of ppGalNAc-T2.** Secondary structure elements from the ppGalNAc-T2 structure are shown, with  $\alpha$ -helices,  $3_{10}$ -helices and  $\beta$ -strands in red.

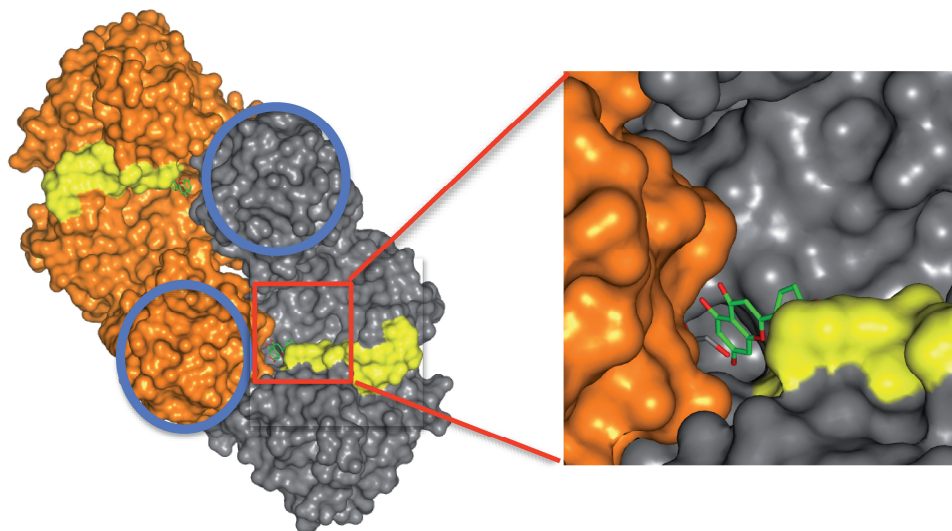

**Fig.S4 Surface representation of one of the dimers present in the asymmetric unit.** The surface of one of the monomers is depicted in grey whereas the other one is in orange. The flexible loop is shown in yellow in both ppGalNAc-T2 molecules. The two circles in blue and the red square point out the lectin domain position of both molecules, and the position of luteolin in one of the monomers, respectively.

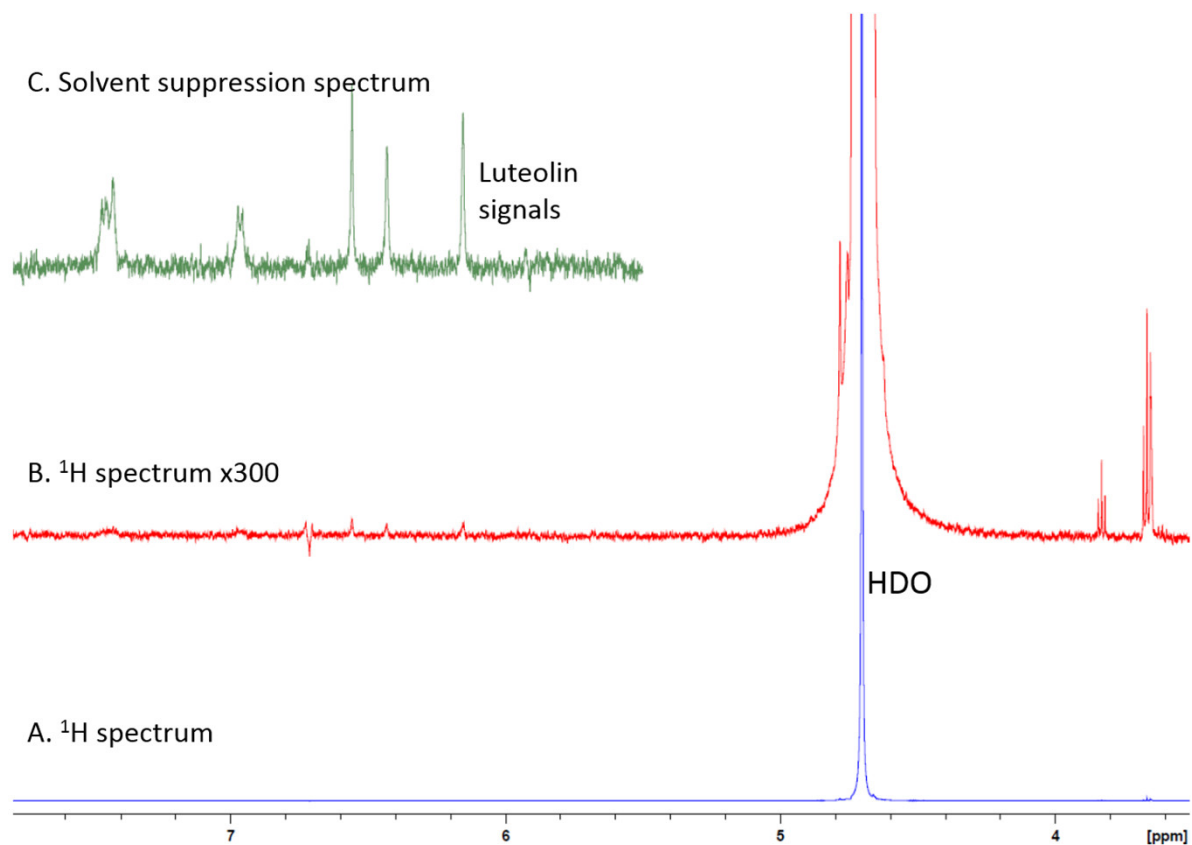

**Fig.S5** Stacked  $^1\text{H}$  NMR spectra of luteolin in deuterated buffer: A. Normal-scale spectrum. HDO is used as standard for chemical shift (4.70 ppm), B. Spectrum with increased intensity (300-fold), where luteolin signals arise, C. Aromatic region of the solvent suppression spectrum.
